# Supplementary material
Source: Copernicus journal article supplement (doi:10.5194/essd-2026-281)
Supplement: Supplementary file 1 [file essd-2026-281-supplement.pdf]

| <b>Region</b> | <b>Country</b> | <b>Spring Name</b>         | <b>Lat.</b> | <b>Lon.</b> | <b>Alt.</b> | <b>Data period</b> | <b>Data resolution</b> |
|---------------|----------------|----------------------------|-------------|-------------|-------------|--------------------|------------------------|
| Alps          | Austria        | Aubachquelle               | 47.36       | 10.172      | 1078        | 1999–2022          | Daily                  |
| Alps          | Austria        | Blaue Quelle               | 47.671      | 12.188      | 471         | 1992–2022          | Daily                  |
| Alps          | Austria        | Brunntal                   | 47.807      | 14.096      | 538         | 1976–2022          | Daily                  |
| Alps          | Austria        | Dachserfall                | 47.545      | 13.332      | 710         | 2006–2022          | Daily                  |
| Alps          | Austria        | Doserfall                  | 47.316      | 10.498      | 993         | 2003–2022          | Daily                  |
| Alps          | Austria        | Etzbachquelle              | 47.531      | 14.609      | 880         | 2014–2022          | Daily                  |
| Alps          | Austria        | Fellbachquelle             | 46.743      | 13.331      | 888         | 1999–2022          | Daily                  |
| Alps          | Austria        | Fidelisquelle              | 46.985      | 9.932       | 1299        | 1998–2022          | Daily                  |
| Alps          | Austria        | Goldbachquelle             | 47.383      | 10.047      | 1000        | 1997–2022          | Daily                  |
| Alps          | Austria        | Gollinger Wasserfall       | 47.602      | 13.138      | 555         | 1999–2022          | Daily                  |
| Alps          | Austria        | Große Mühlquelle           | 47.909      | 15.203      | 540         | 1995–2022          | Daily                  |
| Alps          | Austria        | Hammerbachquelle           | 47.21       | 15.348      | 410         | 1995–2022          | Daily                  |
| Alps          | Austria        | Heiterwandquelle           | 47.3        | 10.722      | 1561        | 2007–2020          | Daily                  |
| Alps          | Austria        | Hirschbrunn-Seeaustritt    | 47.547      | 13.659      | 508         | 2008–2022          | Daily                  |
| Alps          | Austria        | Langwies/Miesbach          | 47.786      | 13.734      | 435         | 1997–2022          | Daily                  |
| Alps          | Austria        | Lappenbachquelle           | 46.725      | 13.043      | 870         | 1999–2022          | Daily                  |
| Alps          | Austria        | Marbachquelle              | 47.253      | 13.414      | 1046        | 1998–2022          | Daily                  |
| Alps          | Austria        | Obwaldquelle               | 46.952      | 9.911       | 1682        | 2008–2022          | Daily                  |
| Alps          | Austria        | Ödensee-Kaltwassertrichter | 47.564      | 13.826      | 770         | 1998–2022          | Daily                  |
| Alps          | Austria        | Oswaldquelle               | 46.833      | 13.769      | 1208        | 2005–2022          | Daily                  |
| Alps          | Austria        | Pfannbauernquelle          | 47.705      | 15.325      | 794         | 1995–2022          | Daily                  |
| Alps          | Austria        | Pießling Ursprung          | 47.693      | 14.276      | 753         | 1980–2022          | Daily                  |
| Alps          | Austria        | Pöllauer Ursprung          | 47.036      | 14.374      | 1150        | 2011–2022          | Daily                  |
| Alps          | Austria        | Pucherhäuslquelle          | 47.43       | 12.693      | 955         | 2006–2022          | Daily                  |
| Alps          | Austria        | Reithbachquelle            | 47.843      | 14.879      | 560         | 1996–2022          | Daily                  |
| Alps          | Austria        | Rettenbachquelle           | 47.755      | 14.315      | 613         | 1991–2022          | Daily                  |
| Alps          | Austria        | Riedlbachquelle            | 47.547      | 13.867      | 820         | 2008–2022          | Daily                  |
| Alps          | Austria        | Sagtümpel                  | 47.583      | 14.031      | 970         | 1998–2022          | Daily                  |
| Alps          | Austria        | Schreiende Brunnen         | 47.434      | 12.58       | 980         | 1998–2022          | Daily                  |

|             |          |                             |        |        |      |           |       |
|-------------|----------|-----------------------------|--------|--------|------|-----------|-------|
| Alps        | Austria  | Schwabeltalquelle           | 47.609 | 14.849 | 800  | 1999–2022 | Daily |
| Alps        | Austria  | Schwarzbach–Moosquelle      | 47.374 | 11.005 | 1454 | 1998–2022 | Daily |
| Alps        | Austria  | Schwarze Torrenquelle       | 47.566 | 13.118 | 518  | 2015–2022 | Daily |
| Alps        | Austria  | Schwarzlackenquelle         | 47.426 | 11.483 | 1199 | 1997–2022 | Daily |
| Alps        | Austria  | Siebenquellen               | 47.683 | 15.567 | 797  | 1995–2022 | Daily |
| Alps        | Austria  | Steinbachquelle             | 47.814 | 14.768 | 500  | 1999–2022 | Daily |
| Alps        | Austria  | Steyernquelle               | 47.825 | 14.353 | 546  | 1998–2022 | Daily |
| Alps        | Austria  | Teufelskirche               | 47.788 | 14.206 | 541  | 1995–2022 | Daily |
| Alps        | Austria  | Totes Weib Quelle           | 47.731 | 15.488 | 880  | 2016–2022 | Daily |
| Alps        | Austria  | Union Quelle                | 46.63  | 13.804 | 556  | 1995–2022 | Daily |
| Alps        | Austria  | Ursprungquelle (Lehnberg)   | 47.335 | 10.927 | 1593 | 2003–2022 | Daily |
| Alps        | Austria  | Waldbachursprung            | 47.545 | 13.608 | 874  | 1996–2022 | Daily |
| Alps        | Austria  | Wasseralmquelle             | 47.733 | 15.647 | 802  | 1995–2022 | Daily |
| Alps        | Austria  | Wassermannsloch             | 47.582 | 14.828 | 585  | 1997–2022 | Daily |
| Alps        | Austria  | Widumbachquelle             | 47.326 | 9.978  | 787  | 2019–2022 | Daily |
| Alps        | France   | Gillardes                   | 44.760 | 5.888  | 870  | 2015-2019 | Daily |
| Alps        | Slovenia | Kamniška Bistrica           | 46.224 | 14.617 | 385  | 1970-2023 | Daily |
| Alps        | Slovenia | Savica                      | 46.293 | 13.797 | 838  | 1954-2024 | Daily |
| Alps        | Slovenia | Soca                        | 46.412 | 13.724 | 990  | 1955-1982 | Daily |
| Alps        | Slovenia | Tolminka                    | 46.259 | 13.725 | 680  | 1953-2024 | Daily |
| Alps        | Germany  | Bergmannsquellen            | 47.539 | 10.772 | 1220 | 2018-2026 | Daily |
| Jura Mts    | France   | Doubs                       | 46.705 | 6.209  | 945  | 2009-2024 | Daily |
| Jura Mts    | France   | La Loue                     | 47.011 | 6.299  | 530  | 1993-2024 | Daily |
| Jura Mts    | France   | Lison                       | 46.967 | 6.011  | 420  | 1976-2024 | Daily |
| Jura Mts    | France   | Verneau                     | 46.978 | 6.002  | 375  | 1969-2024 | Daily |
| Carpathians | Serbia   | Grza                        |        |        |      |           |       |
| Carpathians | Serbia   | Vrelo Mlave                 | 44.192 | 21.784 | 320  | 1991-1999 | Daily |
| Carpathians | Czechia  | Punkva                      | 49.333 | 16.650 | 300  | 1980-2023 | Daily |
| Carpathians | Slovakia | Dolná Lehota - Vrabec 2     | 48.860 | 19.527 | 600  | 2016-2024 | Daily |
| Carpathians | Slovakia | Liptovská Teplička - Macová | 48.929 | 20.124 | 1100 | 2016-2024 | Daily |

|             |          |                               |        |        |      |           |       |
|-------------|----------|-------------------------------|--------|--------|------|-----------|-------|
| Carpathians | Slovakia | Lysá Poľana - Tisovky         | 49.252 | 20.103 | 1000 | 2016-2024 | Daily |
| Carpathians | Slovakia | Muráň - Vyvieračka pod hradom | 48.757 | 20.070 | 430  | 2016-2024 | Daily |
| Carpathians | Slovakia | Slavec - Čierna vyvieračka    | 48.562 | 20.465 | 250  | 2016-2024 | Daily |
